# Supplementary material for: Two-dimensional carbon dioxide with high stability, a negative Poisson's ratio and a huge band gap
Source: Royal Society of Chemistry journal article supplement (doi:10.1039/c8cp02742k), 2018-01-01
Supplement: c8cp02742k1.pdf [file c8cp02742k1.pdf]

## Supplementary information

### Two-Dimensional Carbon Dioxide with High-stability, Negative Poisson's Ratio and Huge Band Gap

Shijie Liu<sup>1,2#</sup>, Hui Du<sup>1,2#</sup>, Guoling Li<sup>1</sup>, Liben Li<sup>1</sup>, Xingqiang Shi<sup>3,\*</sup>, Bingbing Liu<sup>2,\*</sup>

<sup>1</sup> School of Physics and Engineering, and Henan Key Laboratory of Photoelectric Energy Storage Materials and Applications, Henan University of Science and Technology, Luoyang 471003, China

<sup>2</sup> State Key Laboratory of Superhard Materials, Jilin University, Changchun 130012, China

<sup>3</sup> Department of Physics, Southern University of Science and Technology, Shenzhen 518055, China

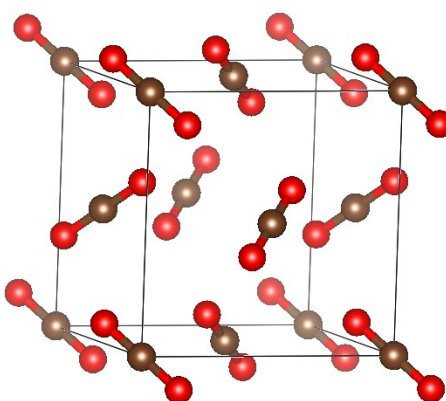

**Figure S1.** The structure of the ambient phase of solid CO<sub>2</sub> (dry ice) (Acta Cryst. B 36, 2750–2751 (1980)).

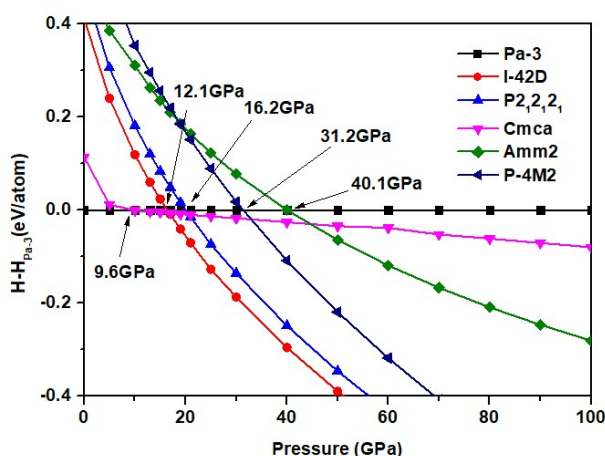

**Figure S2.** Calculated enthalpies of difference structures of CO<sub>2</sub> as a function of pressure. The enthalpy of the ambient phase (Pa-3) of solid CO<sub>2</sub> is used as the zero-

enthalpy reference. I-42D,  $P2_12_12_1$  and Cmca are high pressure phases of CO<sub>2</sub> that have been reported (Science 283, 1510 (1999); Physical Review Letters 83, 5527 (1999)).
